# Supplementary material
Source: publisher figshare collection journal article supplement (https://acs.figshare.com/ndownloader/files/4657582)
Supplement: Supplementary file 1 [file 4657582]

## Supporting information

### Brønsted-Evans-Polanyi Relation of Multi-step Reactions and Volcano Curve in Heterogeneous Catalysis

Jun Cheng, P. Hu\*, Peter Ellis, Sam French, Gordon Kelly, C. Martin Lok

To formulate the derivation of rate expressions, the Dumesic's method<sup>1</sup> in terms of De Donder relations<sup>2[19]</sup> is utilized. Dumesic defined the reversibility of the elementary step  $i$ ,  $z_i$ , as:

$$z_i = \frac{\prod_j a_j^{v_{ij}}}{K_{ieq}} \quad (1)$$

where  $v_{ij}$  is the stoichiometric coefficient for the  $j$  reactant (or product) of step  $i$ ,  $a_j$  is the activity of the  $j$  reactant (or product) of the step  $i$  and  $K_{ieq}$  is the standard equilibrium constant.

It should be noted that the value of  $z_i$  is between 0 to 1 if step  $i$  proceeds in the forward direction. When the value of  $z_i$  approaches zero, step  $i$  is irreversible; as it approaches one, step  $i$  reaches quasi-equilibrium. The net reaction rate of step  $i$ ,  $r_i$ , can be expressed in terms of the reversibility,  $z_i$ :

$$r_i = r_{+i} - r_{-i} = r_{+i}(1 - z_i) \quad (2)$$

where  $r_{+i}$  and  $r_{-i}$  are the forward and backward reaction rate of step  $i$ , respectively.

On the basis of the two-step (adsorption and desorption) model in the main text (Scheme 1 and Figure 1), we derive the reaction rate as follows:

At steady state, the reaction rate ( $r$ ) is equal to the adsorption ( $r_{ads}$ ) and desorption ( $r_{des}$ ) rate:

$$r = r_{ads} = r_{des} \quad (3)$$

According to Eq. (2), the adsorption rate can be expressed as:

$$r_{ads} = k_{ads} P_R \theta_* (1 - z_{ads}) \quad (4)$$

where  $P_R$  is the partial pressure of reactant  $R$ ,  $\theta_*$  is the coverage of free surface sites,  $k_{ads}$  is the rate constant of adsorption and  $z_{ads}$  is the reversibility of adsorption. From Eq. (1),  $z_{ads}$  is equal to

$$z_{ads} = \frac{\theta_I}{P_R \theta_* K_{ads}} \quad (5)$$

where  $\theta_I$  is the coverage of surface intermediate  $I$  and  $K_{ads}$  is the standard equilibrium constant of adsorption.

Similarly, the desorption rate can be written as:

$$r_{des} = k_{des} \theta_I (1 - z_{des}) \quad (6)$$

where  $k_{des}$  is the rate constant of desorption and  $z_{des}$  is the reversibility of desorption.

The total surface coverage is equal to one, thus,

$$\theta_* + \theta_I = 1 \quad (7)$$

In the sequential reaction system, the overall reversibility ( $z_{tot}$ ) is equal to the product of the reversibility of each step, thus,

$$z_{tot} = z_{ads} z_{des} = \frac{P_P}{P_R K_{eq}} \quad (8)$$

where  $P_P$  is the partial pressure of reactant  $P$  and  $K_{eq}$  is the overall standard equilibrium constant.

The rate constants and equilibrium constants that appear in the above equations can be expressed:

$$k_{ads} = \frac{k_B T}{h} e^{\frac{S_R}{R}} e^{-\frac{E_R^{dis}}{RT}} \quad (9)$$

$$k_{des} = \frac{k_B T}{h} e^{-\frac{E_P^{ass}}{RT}} \quad (10)$$

$$K_{ads} = e^{-\frac{S_R}{R}} e^{-\frac{\Delta H_R}{RT}} \quad (11)$$

$$K_{eq} = e^{\frac{\Delta G}{RT}} = e^{\frac{\Delta H - T(S_P - S_R)}{RT}} \quad (12)$$

where  $S_R$  and  $S_P$  are the entropy of reactant and product, respectively,  $\Delta G$  and  $\Delta H$  are the Gibbs free energy change and enthalpy change of the overall reaction, respectively, and the other terms are defined in the main text. It should be mentioned that the entropy of surface intermediate  $I$  is usually very small and neglected in this treatment.

Combining Eq. (3)-(12), the reaction rate can be derived:

$$r = \frac{k_B T}{h} \frac{(1 - \frac{P_P}{P_R} e^{\frac{\Delta G}{RT}})}{\frac{1}{P_R} e^{\frac{S_R}{R}} e^{-\frac{E_R^{dis}}{RT}} (1 + e^{-\frac{E_R^{ass} - E_P^{ass}}{RT}}) + e^{\frac{E_P^{ass}}{RT}} (1 + \frac{P_P}{P_R} e^{\frac{\Delta G}{RT}} e^{-\frac{E_R^{ass} - E_P^{ass}}{RT}})} \quad (13)$$

If assuming adsorption is the rate-determining step, desorption achieves quasi-equilibrium,  $z_{des}$  is close to one and  $z_{ads}$  is approximate to  $z_{tot}$ . Thus, the reaction rate is expressed as:

$$r = \frac{k_B T}{h} \frac{(1 - \frac{P_P}{P_R} e^{\frac{\Delta G}{RT}})}{\frac{1}{P_R} e^{\frac{S_R}{R}} e^{-\frac{E_R^{dis}}{RT}} + \frac{P_P}{P_R} e^{\frac{\Delta G}{RT}} e^{-\frac{E_R^{ass}}{RT}}} \quad (14)$$

Similarly, the reaction rate is in the following form if assuming desorption is the rate-determining step:

$$r = \frac{k_B T}{h} \frac{(1 - \frac{P_P}{P_R} e^{\frac{\Delta G}{RT}})}{\frac{1}{P_R} e^{\frac{S_R}{R}} e^{\frac{\Delta H_R + E_P^{ass}}{RT}} + e^{\frac{E_P^{ass}}{RT}}} \quad (15)$$

Since both adsorption and desorption follow the BEP relation, the activation energies ( $E_R^{dis}$ ,  $E_R^{ass}$ ,  $E_P^{dis}$ , and  $E_P^{ass}$ ) in Eq. (13)-(15) are controlled by  $\Delta H_R$  and  $\Delta H_P$ . Moreover,  $\Delta H_R$  and  $\Delta H_P$  are related, and their difference is the overall enthalpy change  $\Delta H$ . So, the overall reaction rate is entirely determined by  $\Delta H_R$ . The plots of TOF against  $\Delta H_R$  in Figure 4 in the main text are obtained from Eq. (13)-(15) together with the BEP relations on the stepped surface. The temperature is chosen as 500 K, the entropy of reactant ( $S_R$ ) and product ( $S_P$ ) are reasonably assumed to be 200 J/mol/K and the overall enthalpy change ( $\Delta H$ ) is set as -0.5 eV.

## References

- 1 (a) Dumesic, J. A. *J. Catal.* **1999**, *185*, 496; (b) Cortright, R. D.; Dumesic, J. A. *Adv. Catal.* **2001**, *46*, 161; (c) Campbell, C. T. *J. Catal.* **2001**, *204*, 520; (d) Dumesic, J. A. *J. Catal.* **2001**, *204*, 525.
- 2 (a) De Donder, Th. in “L’Affinité.” Gauthier-Villiers, Paris, **1927**; (b) Boudart, M. in “Kinetics of Chemical Processes.” Prentice-Hall, Englewood Cliffs, NJ, **1968**; (c) Boudart, M. *J. Phys. Chem.* **1983**, *87*, 2786; (d) Holstein, W. L.; Boudart, M. *J. Phys. Chem. B* **1997**, *101*, 9991.
